# Supplementary material for: Lipid digestion of oil-in-water emulsions stabilized with low molecular weight surfactants
Source: Royal Society of Chemistry journal article supplement (doi:10.1039/c9fo02210d), 2019-01-01
Supplement: c9fo02210d1.pdf [file c9fo02210d1.pdf]

## Supporting Information

### **Lipid digestion of oil-in-water emulsions stabilized with low molecular weight surfactants**

Natalie Ng<sup>1</sup>, Peter X. Chen<sup>1,2</sup>, Saeed M. Ghazani<sup>1</sup>, Alejandro Marangoni<sup>1</sup>,  
H. Douglas Goff<sup>1</sup>, Iris J. Joye<sup>1</sup>, and Michael A. Rogers<sup>1\*</sup>

<sup>1</sup>Department of Food Science, University of Guelph, Guelph, Ontario, Canada, N1G 2W1

<sup>2</sup>School of Pharmacy, University of Waterloo, Waterloo, Ontario, Canada, N2L 3G1

### **Corresponding Author**

\*Email: mroger09@uoguelph.ca

### Proton NMR

The  $^1\text{H}$  NMR spectrum was collected on a Bruker AVANCE III 600 MHz spectrometer (Bruker, Milton, ON, Canada) equipped with a 5 mm TCI cryoprobe (Bruker, Milton, ON, Canada). A 20  $\mu\text{L}$  sample of purified *sn*-2 glycerol monooleate (2-GMO) was dissolved in 600  $\mu\text{L}$   $\text{CDCl}_3$  (99.9%, Cambridge Isotope Laboratories, Tewksbury, MA, USA) and temperature was regulated at  $298 \pm 1$  K. The spectrum was referenced to residual internal  $\text{CHCl}_3$  ( $\delta$  7.26). Purified 2-GMO:  $^1\text{H}$  NMR ( $\text{CDCl}_3$ , 600 MHz):  $\delta$  5.34 (m, 2H), 4.92 (quint, 1H,  $J = 4.7$  Hz), 3.83 (m, 4H), 2.37 (t, 2H,  $J = 7.6$  Hz), 2.01 (m, 4H), 1.64 (quint, 2H,  $J = 7.4$  Hz), 1.28 (m, 36.6H), 0.88 (t, 12.6H,  $J = 7.0$  Hz). The inflated integrations of 36.6H and 12.6H are due to residual heptane in the sample (Figure S1). These assignments are consistent with those reported for *sn*-2 monoglycerides from soybean oil <sup>83</sup>.

The region from 5.25 to 3.5 ppm of the  $^1\text{H}$  NMR spectrum (Figure S2) included intense peaks attributed to glycerol backbone protons of 2-GMO and low intensity peaks corresponding to the glycerol backbone protons of diolein and *sn*-1/3 glycerol monooleate. Other low intensity peaks in this region included a multiplet corresponding to a  $\text{CH}_2$  group from the ethyl oleate by-product at 4.11 ppm and a peak at 4.02 ppm attributed to an unknown impurity, which was also present in the  $^1\text{H}$  NMR of the pure triolein starting material (data not shown). By integrating all the peaks in this region, the purity of 2-GMO was calculated relative to all the glycerol-containing compounds and found to be  $\sim 97$  mol %.

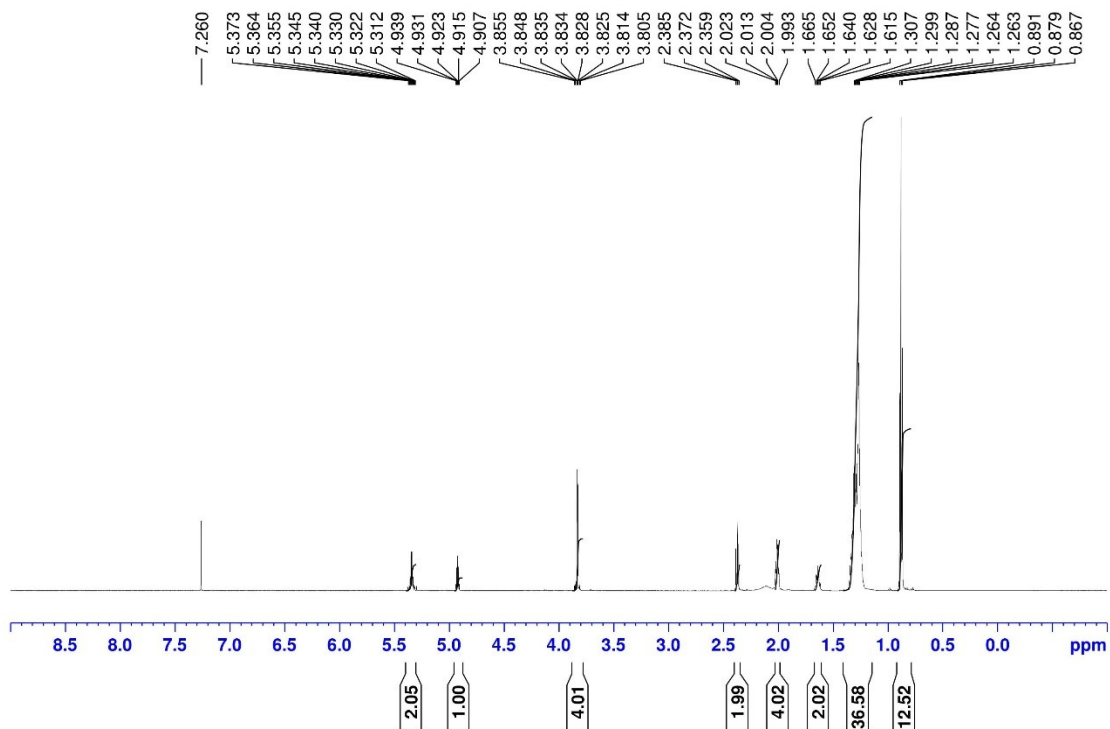

**Figure S1.**  $^1\text{H}$  NMR spectrum ( $\text{CDCl}_3$ , 600 MHz) of 2-GMO.

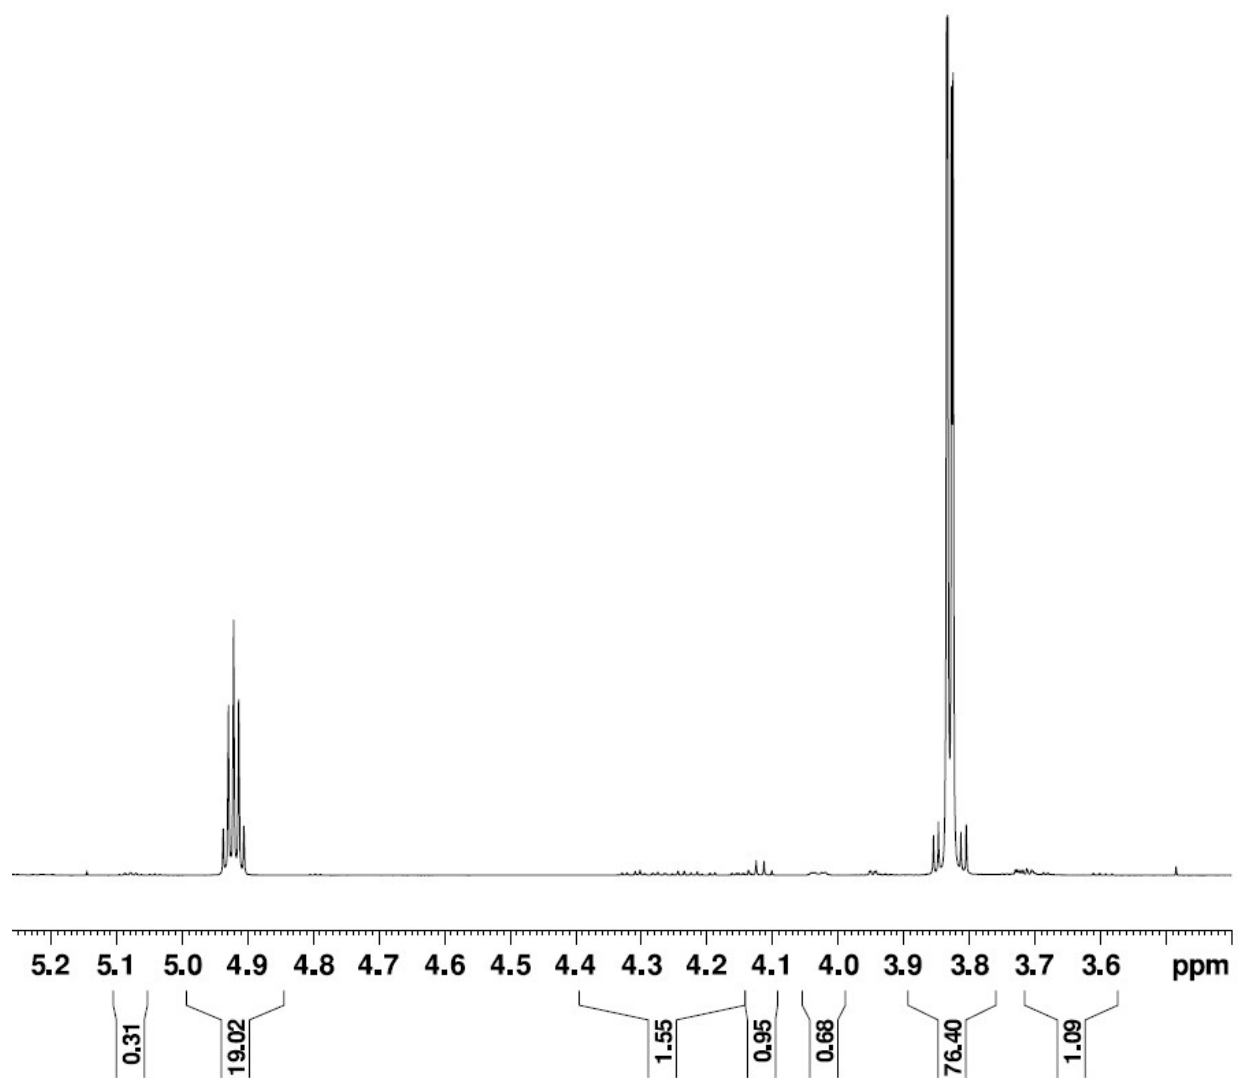

**Figure S2.**  $^1\text{H}$  NMR spectrum ( $\text{CDCl}_3$ , 600 MHz) of the glycerol backbone region of 2-GMO.

### HPLC Calibration Curves

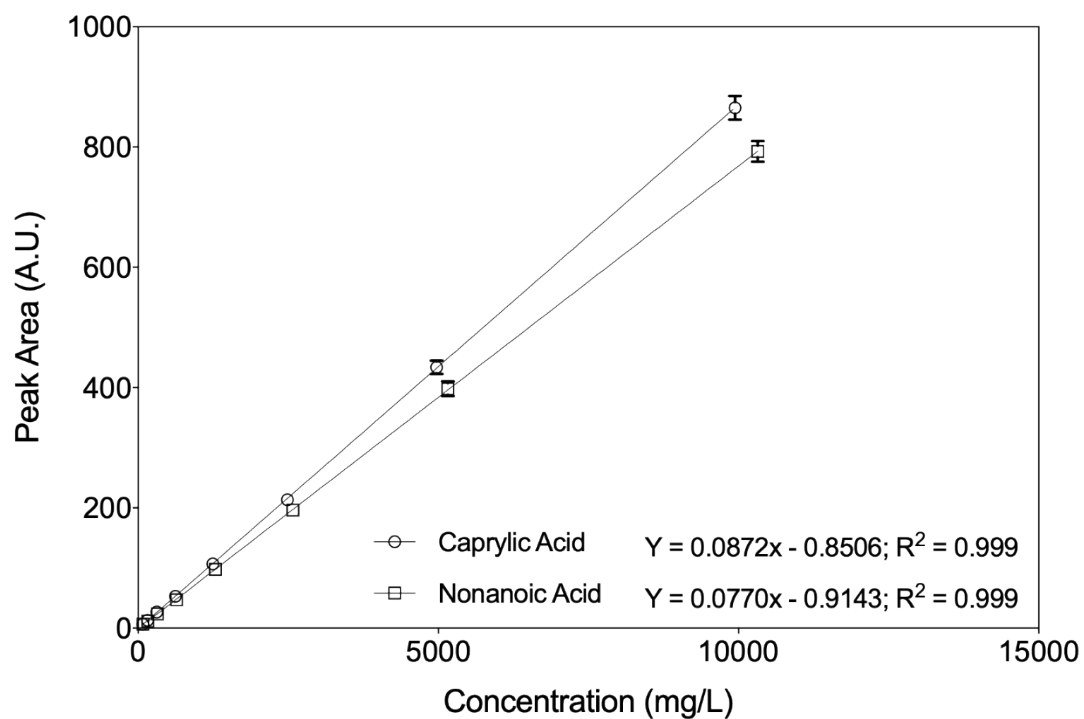

**Figure S3.** Calibration curves for nonanoic acid and caprylic acid in acetonitrile-water (60:40) over a concentration range of 78-10000 mg/L using HPLC-DAD with absorbance set to 210nm.

*Area Under the Curve*

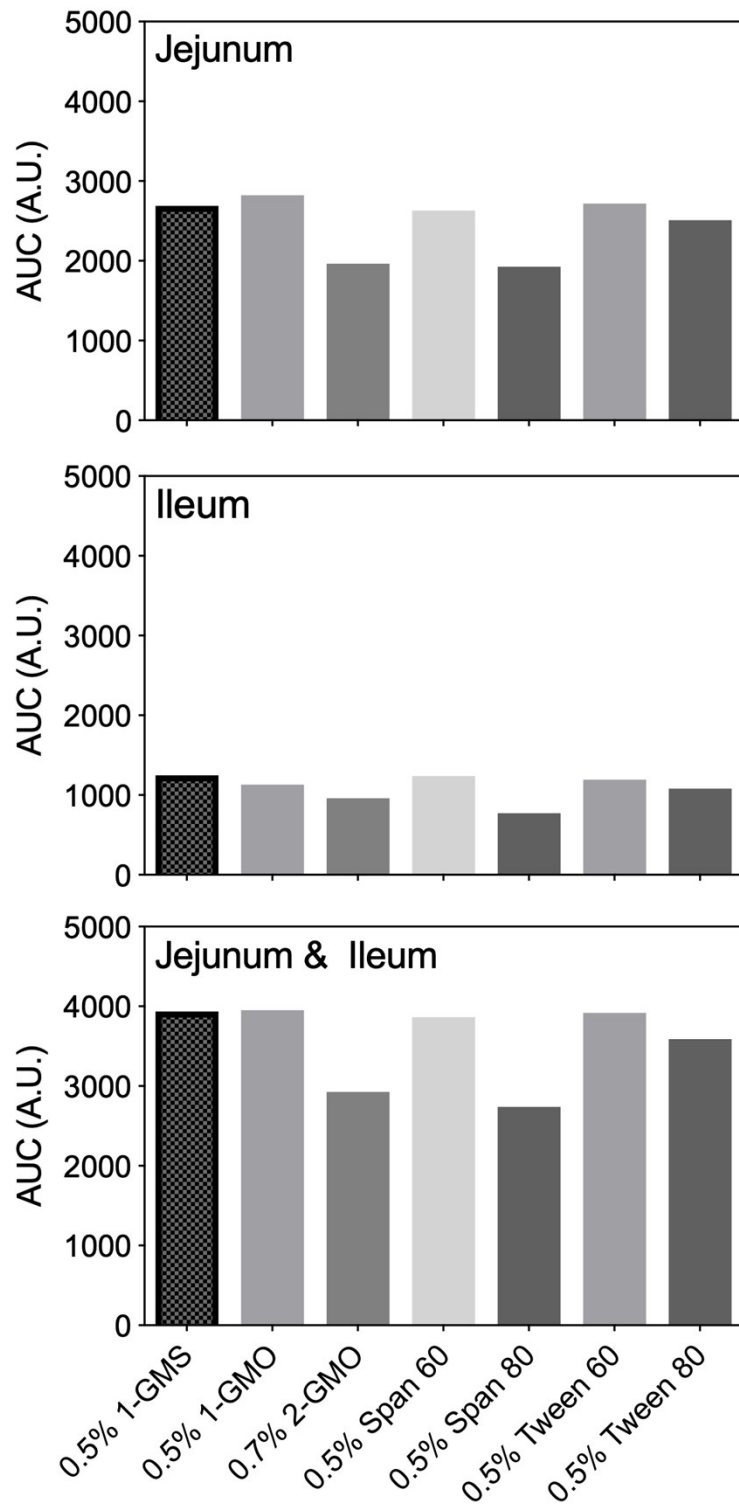

**Figure S4.** Area under the curve (AUC, expressed in A.U.) calculated from the absolute bioaccessibility values of caprylic acid over the 5 h digestion period using the trapezoid method.
